# Supplementary material
Source: PubMed Central journal article supplement (PMC2699366)
Supplement: emboj2009143s2.pdf [file emboj2009143s2.pdf]

**Supplementary figure 1.** Anomalous electron density map for SeMet. The red net represents an anomalous Fourier difference map for SeMet-labeled CopA-PN contoured at  $10\sigma$ . The positions of the anomalous peaks for Se coincide with those of three and four (out of five) Met residues in MolA (yellow) and MolB (cyan), respectively, in the refined model of CopA-PN.
