# Supplementary material
Source: PubMed Central journal article supplement (PMC2699366)
Supplement: emboj2009143s4.pdf [file emboj2009143s4.pdf]

**Supplementary figure 2.** Identification of AMPPCP and divalent cations associated with it. **(A)** A simulated annealed omit map (cyan net) contoured at  $4.5\sigma$  of AMPPCP-Mg<sup>2+</sup> and its coordinating water molecules. The orange net represents an anomalous Fourier difference map for I of 2'-I AMPPNP contoured at  $6\sigma$ . **(B)** An anomalous Fourier difference map for Mn of AMPPCP-Mn<sup>2+</sup> contoured at  $6\sigma$  (red net), and an  $|F_{\text{obs}}| - |F_{\text{obs}}|$  (native - Mg<sup>2+</sup>-removed) map contoured at  $6\sigma$  representing Mg<sup>2+</sup> (green net). Mg<sup>2+</sup> was removed by soaking the crystals in the crystallization buffer without Mg<sup>2+</sup>. AMPPCP is shown in ball-and-stick.
