# Supplementary material
Source: PubMed Central journal article supplement (PMC2699366)
Supplement: emboj2009143s10.pdf [file emboj2009143s10.pdf]

**Supplementary figure 5.** Structure of ADP-Mg<sup>2+</sup> bound to CopA-PN. The small spheres represent Mg<sup>2+</sup> (green) and coordinating water molecules (red) in MolA (**A**, **B**) and in MolB (**C**). The blue broken lines show likely hydrogen bonds. The cyan net in **A** represents a simulated annealed omit map for ADP and Mg<sup>2+</sup> contoured at 4.5 $\sigma$ . Both MolA and MolB contain a Mg<sup>2+</sup>. Two oxygen atoms in  $\alpha$ - and  $\beta$ -phosphates and four water molecules complete the octahedral coordination sphere of Mg<sup>2+</sup> (**B**).
