# Supplementary material
Source: PubMed Central journal article supplement (PMC2699366)
Supplement: emboj2009143s11.pdf [file emboj2009143s11.pdf]

## Supplementary Table I

### Diffraction data statistics

| Crystal                          | SeMet<br>AMPPCP-Mg         | Wild type<br>AMPPCP-Mn     | Wild type<br>AMPPCP<br>without Mg | Wild type<br>2'I-AMPPNP-<br>Mg |
|----------------------------------|----------------------------|----------------------------|-----------------------------------|--------------------------------|
| Resolution                       | 100.0-2.50                 | 100.0-2.35                 | 100.0-1.90                        | 100-2.7                        |
| Range, Å                         | (2.56-2.50)                | (2.42-2.35)                | (1.96-1.9)                        | (2.8-2.7)                      |
| Wavelength, Å                    | 0.9792                     | 1.0                        | 0.9                               | 1.2                            |
| Space group                      | <i>P</i> 4 <sub>3</sub> 22 | <i>P</i> 4 <sub>3</sub> 22 | <i>P</i> 4 <sub>3</sub> 22        | <i>P</i> 4 <sub>3</sub> 22     |
| Cell <i>a=b</i> , Å              | 90.982                     | 90.939                     | 90.528                            | 90.560                         |
| <i>c</i> , Å                     | 191.973                    | 191.257                    | 191.184                           | 190.214                        |
| <i>R</i> <sub>merge</sub> , %    | 9.5 (57.8)                 | 7.5 (44.5)                 | 12.9 (58.2)                       | 9.0 (46.4)                     |
| <i>I</i> / $\sigma$ ( <i>I</i> ) | 32.5 (5.0)                 | 34.0 (4.6)                 | 22.6 (3.1)                        | 37.6 (7.6)                     |
| Completeness,<br>%               | 100 (100)                  | 99.8 (99.7)                | 99.8 (99.7)                       | 99.9 (100)                     |
| Redundancy                       | 14.3 (13.9)                | 8.0 (8.1)                  | 7.4 (7.4)                         | 19.1 (19.4)                    |

Parentheses denote statistics in the highest-resolution shells. To obtain crystals of AMPPCP-bound

CopA-PN without Mg<sup>2+</sup>, we soaked the AMPPCP-Mg<sup>2+</sup>-bound crystals with only AMPPCP. Other

crystals were prepared by co-crystallization.
