# Supplementary material
Source: PubMed Central journal article supplement (PMC2699366)
Supplement: emboj2009143s12.pdf [file emboj2009143s12.pdf]

## Supplementary Table II

### Distance between His/Gln462 and the $\alpha$ -phosphate

| Protein atom  |                | AMPPCP (WT) |      | AMPPCP (mutant) |      |
|---------------|----------------|-------------|------|-----------------|------|
|               |                | O2 $\alpha$ | O5*  | O2 $\alpha$     | O5*  |
| His462 WT     | N $\epsilon$ 2 | 3.14        | 4.00 | 2.40            | 3.73 |
|               | C $\epsilon$ 1 | 4.32        | 4.70 | 3.61            | 4.42 |
|               | C $\epsilon$ 2 | 3.66        | 4.94 | 2.96            | 4.64 |
| Gln462 mutant | N $\epsilon$ 2 | 3.70        | 4.00 | 2.99            | 3.70 |

The atomic models for MolB of the wild type and the His462Gln mutant are superimposed (Fig. 4) and the distances ( $\text{\AA}$ ) between the atoms of His/Gln462 and the closest two oxygen atoms in AMPCP (O2 $\alpha$  and O5\*) are measured.
