# Supplementary material
Source: PubMed Central journal article supplement (PMC2699366)

**MolB**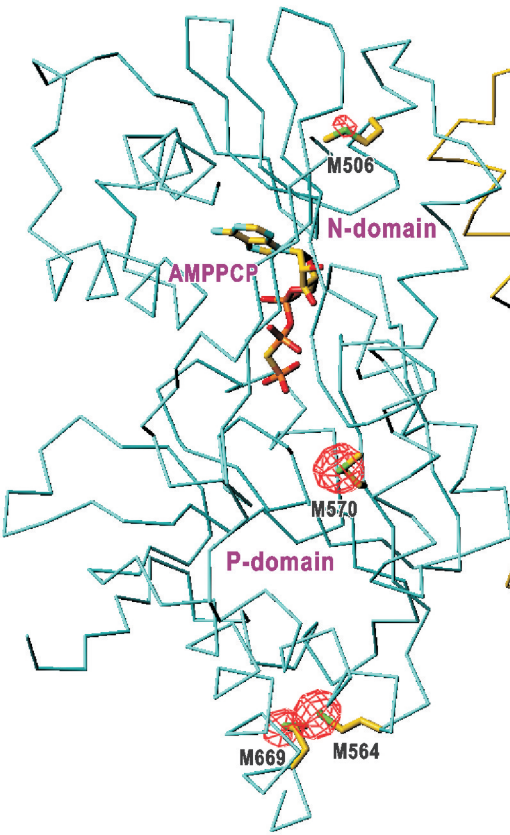**MolA**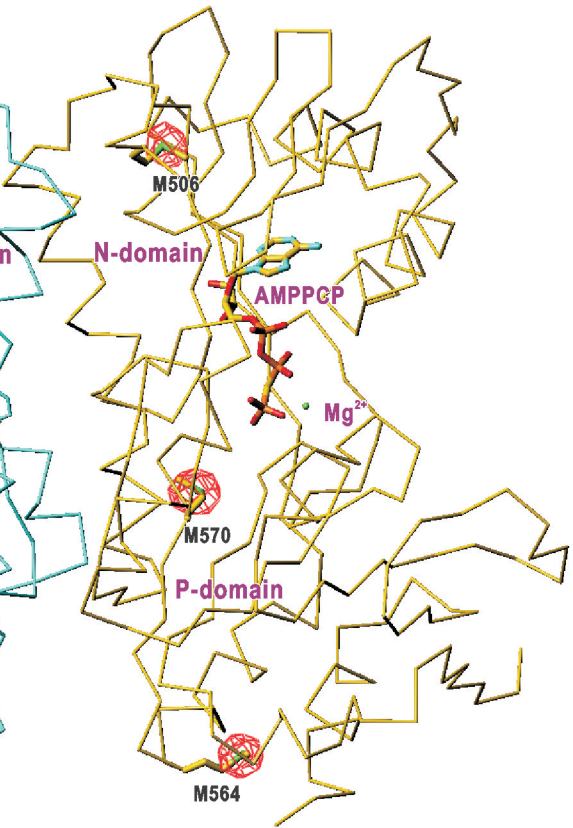

Supplement: emboj2009143s1.pdf [file emboj2009143s1.pdf]

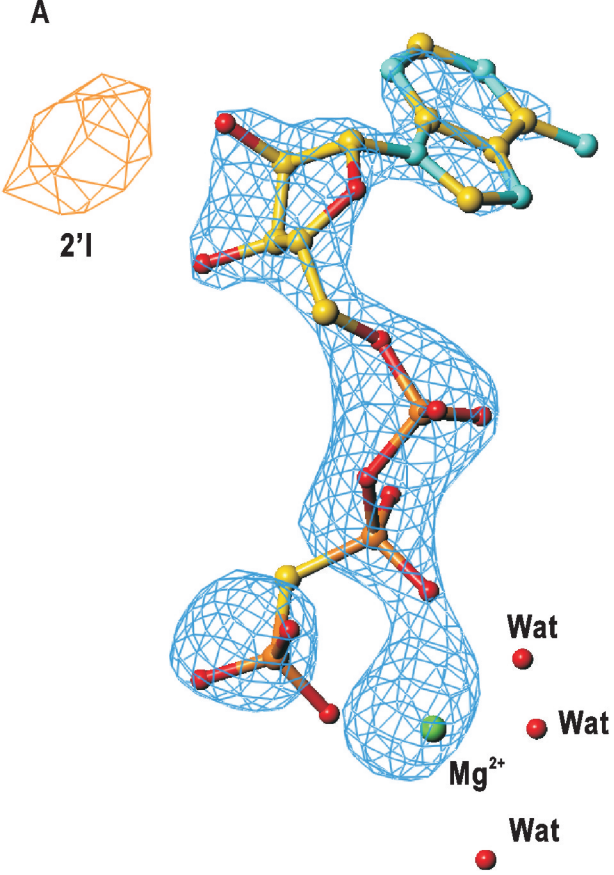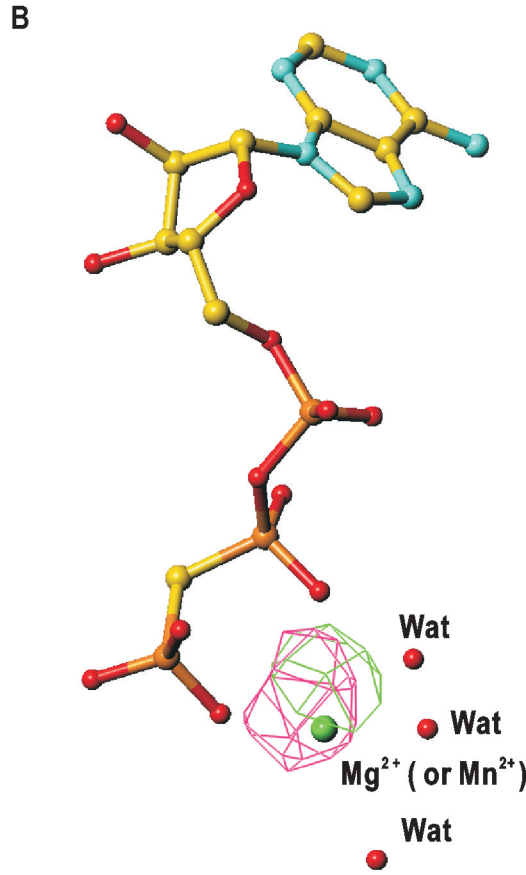

Supplement: emboj2009143s3.pdf [file emboj2009143s3.pdf]

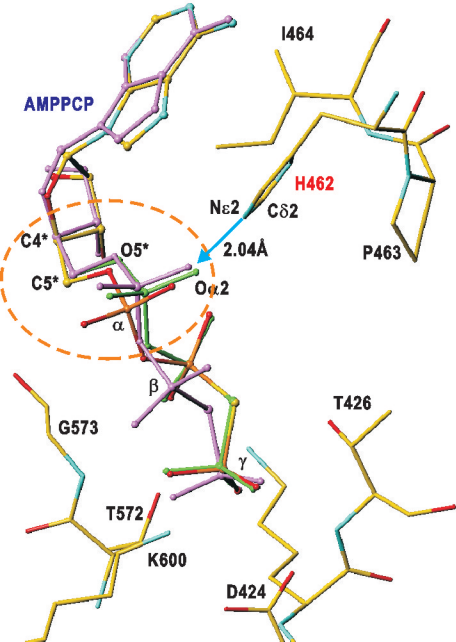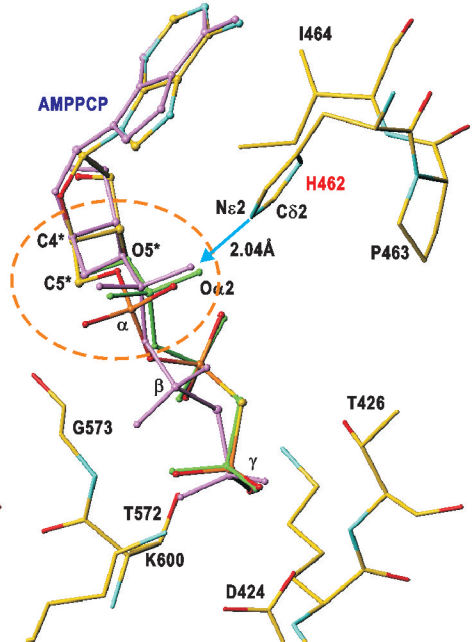

Supplement: emboj2009143s5.pdf [file emboj2009143s5.pdf]

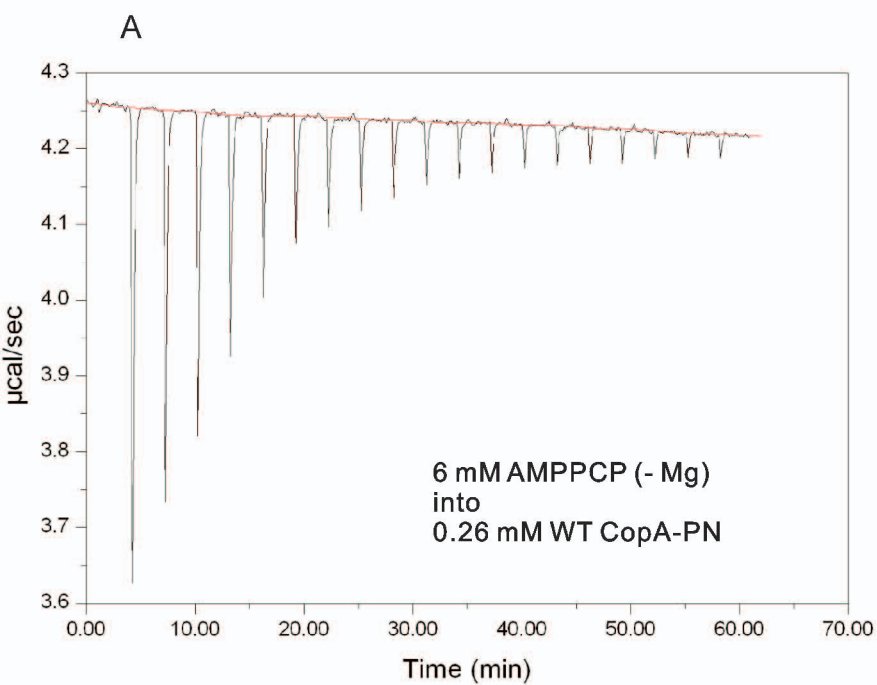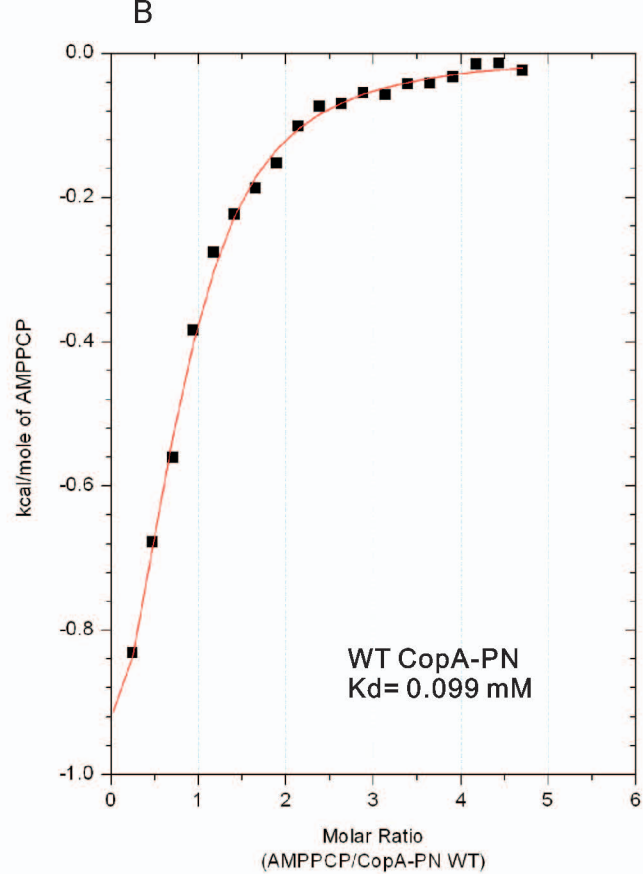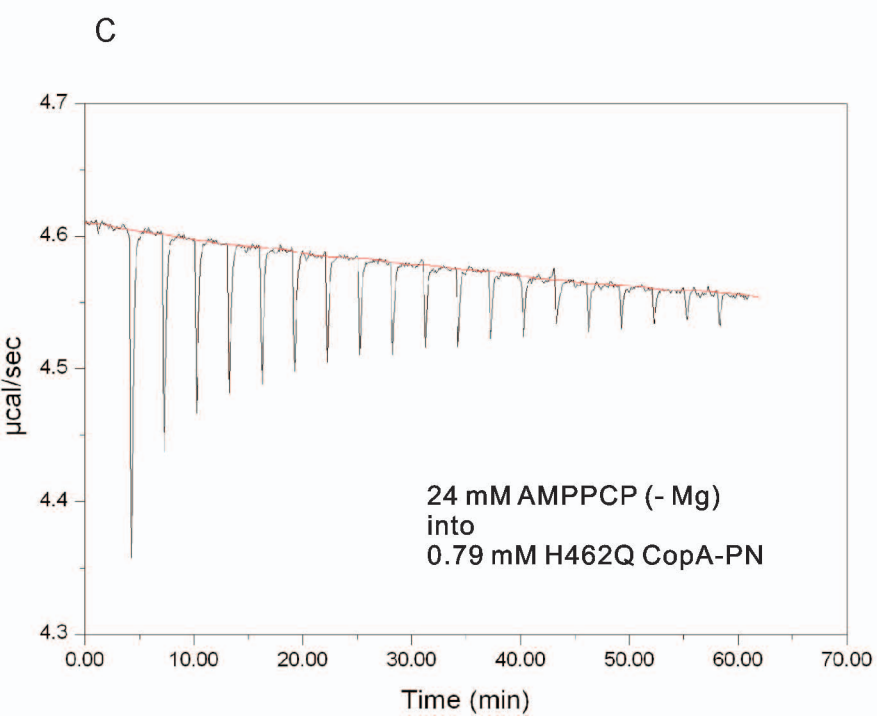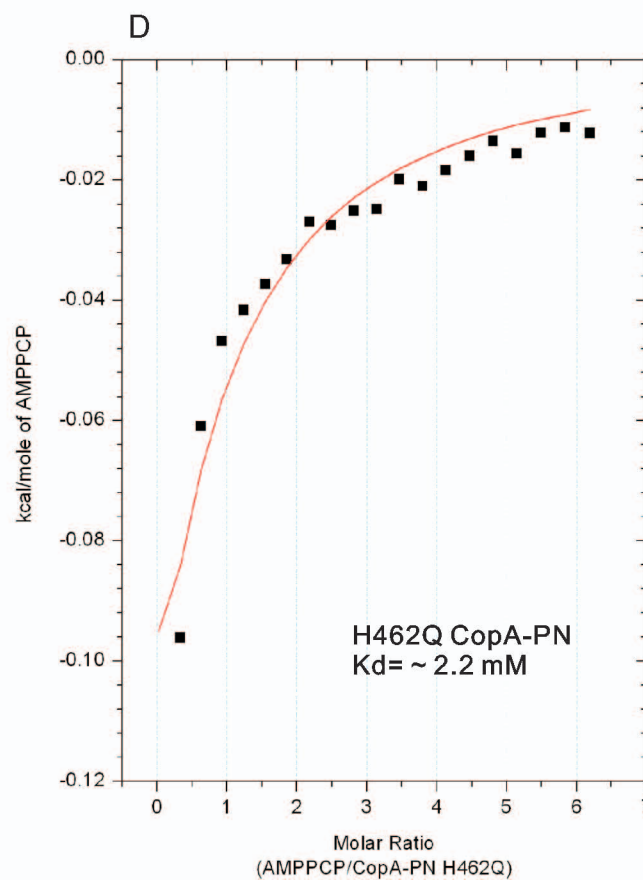

Supplement: emboj2009143s7.pdf [file emboj2009143s7.pdf]

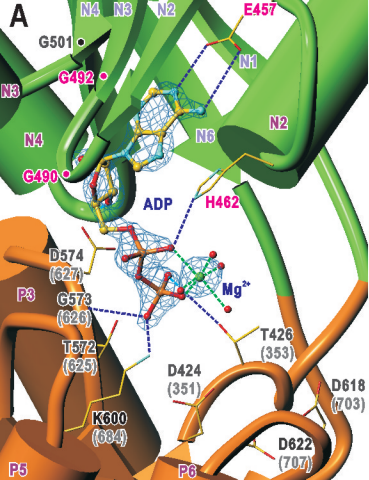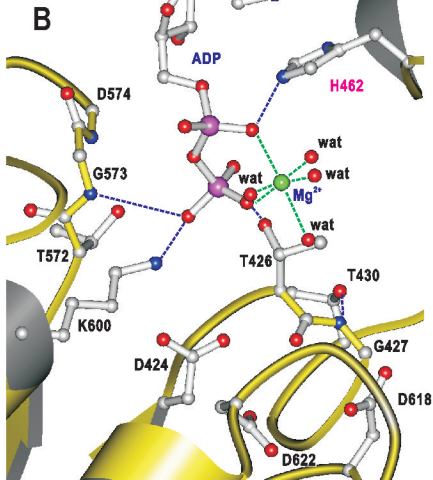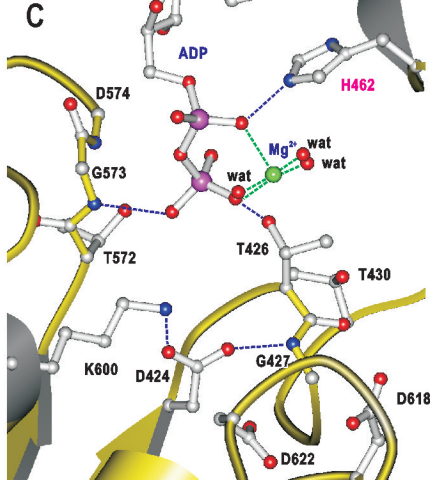

Supplement: emboj2009143s9.pdf [file emboj2009143s9.pdf]
